# Supplementary material
Source: MDPI journal article supplement (https://www.mdpi.com/2073-4433/10/8/440)

## Supplemental Materials

Supplemental Table 1 – Metadata of Samples

| Sample ID | Start Date | Start Location |       | End Date | End Location |        | Middle Location |        |
|-----------|------------|----------------|-------|----------|--------------|--------|-----------------|--------|
| #         | dd.mm      | Lat.           | Long. | dd.mm    | Lat.         | Long.  | Lat.            | Long.  |
| 1         | 07.04      | 35.467         | 26.4  | 08.04    | 33.27        | 29.83  | 34.367          | 28.117 |
| 2         | 08.04      | 33.267         | 29.83 | 09.04    | 33.55        | 34.05  | 33.408          | 31.941 |
| 3         | 09.04      | 33.55          | 34.05 | 10.04    | 33.68        | 32.15  | 33.617          | 33.1   |
| 4         | 10.04      | 33.68          | 32.15 | 11.04    | 33.58        | 28.733 | 33.63           | 30.44  |
| 5         | 11.04      | 33.58          | 28.73 | 12.04    | 34.48        | 24.317 | 34.03           | 26.525 |
| 6         | 12.04      | 34.48          | 24.32 | 13.04    | 35.467       | 21.95  | 34.98           | 23.13  |
| 7         | 13.04      | 35.467         | 21.95 | 14.04    | 35.15        | 18.7   | 35.31           | 20.325 |
| 8         | 14.04      | 35.15          | 18.7  | 15.04    | 36.5         | 19     | 35.825          | 18.85  |
| 9         | 18.04      | 37.32          | 17.2  | 19.04    | 38.5         | 12.67  | 37.91           | 14.93  |
| 10        | 19.04      | 38.5           | 12.67 | 20.04    | 40.13        | 11.23  | 39.317          | 11.95  |
| 11        | 20.04      | 40.13          | 11.23 | 21.04    | 38.5         | 8.2    | 39.317          | 9.717  |
| 12        | 21.04      | 38.5           | 8.2   | 22.04    | 38.45        | 4.5    | 38.475          | 6.35   |
| 13        | 22.04      | 38.45          | 4.5   | 23.04    | 37.9         | 1      | 38.175          | 2.75   |
| 14        | 23.04      | 37.83          | 1.75  | 24.04    | 36.4         | 1.7    | 37.12           | 1.725  |
| 15        | 24.04      | 36.4           | 1.7   | 25.04    | 35.98        | -5.38  | 36.19           | -1.84  |
| 16        | 25.04      | 35.98          | -5.38 | 26.04    | 36.68        | -8.5   | 36.33           | -6.94  |

Supplemental Table 2 – Detailed Description of Common Bacteria

| Family             | Genus           | Gram Stain | Oxygen Requirement    | Spore Forming | Habitat                                                                      | Previously found airborne | Indoor or Outdoor | Location                                     | Source             | Citation                                                                                                                                                                                                                                                                                          | Description reference               |
|--------------------|-----------------|------------|-----------------------|---------------|------------------------------------------------------------------------------|---------------------------|-------------------|----------------------------------------------|--------------------|---------------------------------------------------------------------------------------------------------------------------------------------------------------------------------------------------------------------------------------------------------------------------------------------------|-------------------------------------|
| Unassigned         | Unassigned      | Variable   | Variable              | NA            | NA                                                                           | NA                        |                   | NA                                           | NA                 | NA                                                                                                                                                                                                                                                                                                | NA                                  |
| Corynebacteriaceae | Corynebacterium | +          | Variable              | N             | Variable, includes animal microbiota, soil, water, plants, and food products | Y                         | Both              | Eastern Mediterranean; Mali; Indoor; Beijing | Sahar, Sahar/Sahel | Griffin et al., 2007; Kellogg et al., 2005; Hwang et al., 2016; Fang et al., 2007; Dybwad et al., 2012 Barberan et al., 2015; Hwang et al., 2016; Bertolini et al., 2013; DeLeon-Rodriguez et al., 2013; Robertson et al., 2013 Adams et al., 2015; Cuthbertson et al., 2017; Pearce et al., 2010 | Bernard, 2012; Alberto et al., 2017 |
| Bifidobacteriaceae | Bifidobacterium | +          | Anaerobic             | N             | Animal and human microbiota                                                  | Y                         | Both              | Indoor dust; Beijing; Milan; NYC Subways     |                    | Bertolini et al., 2013; DeLeon-Rodriguez et al., 2013; Robertson et al., 2013 Adams et al., 2015; Cuthbertson et al., 2017; Pearce et al., 2010                                                                                                                                                   | O'Callaghan & van Sinderen, 2016    |
| Weeksellaceae      | Cloacibacterium | -          | Facultative Anaerobic | N             | Aquatic                                                                      | Y                         | Both              | Indoor; Chicago IL, USA; Antarctica; Arctic  |                    | Cuthbertson et al., 2017; Pearce et al., 2010                                                                                                                                                                                                                                                     | Allen et al., 2006                  |

|                   |                   |          |                       |          |                              |   |         |                                          |               |                                                                                                                                   |  |                                                              |
|-------------------|-------------------|----------|-----------------------|----------|------------------------------|---|---------|------------------------------------------|---------------|-----------------------------------------------------------------------------------------------------------------------------------|--|--------------------------------------------------------------|
| Chitinophagaceae  | Sediminibacterium | -        | Aerobic               | N        | Freshwater; Soil             | N | -       |                                          |               |                                                                                                                                   |  | Kang et al., 2014; Qu and Yuan, 2008                         |
| Bacillaceae       | Bacillus          | +        | Facultative Anaerobic | Y; U     | Soil                         | Y | Outdoor | Washington D.C                           | n/a           | Be et al., 2015                                                                                                                   |  | Su and Xu, 2014                                              |
| Paenibacillaceae  | Ammoniphilus      | Variable | Aerobic               | Y        | Plant roots, resin fragments | Y | Both    | France; Beijing                          |               | Cao et al., 2014; Brudan et al., 2009                                                                                             |  | Zaitsev et al., 1998; Rainey et al., 2015; Lin et al., 2015; |
| Planococcaceae    | Unassigned        | Variable | Variable              | Variable | Variable                     | Y | Outdoor | Israel; Milan                            | N.Africa      | Mazar et al., 2016; Bertolini et al., 2013                                                                                        |  | Shivaji et al., 2014                                         |
| Staphylococcaceae | Staphylococcus    | +        | Facultative Anaerobic | N        | Variable                     | Y | Both    | Japan, Slovenia; Norway; France; Beijing | Asian deserts | Maki et al., 2018; Mulec et al., 2017; Fang et al., 2007; Barberan et al., 2015; Dybwad et al., 2012; Martin-Sanchez et al., 2014 |  | G_tz et al., 2006                                            |

|                       |                |             |             |             |                                                                                      |   |         |                           |                    |                                   |                                                |
|-----------------------|----------------|-------------|-------------|-------------|--------------------------------------------------------------------------------------|---|---------|---------------------------|--------------------|-----------------------------------|------------------------------------------------|
| Turicibacteraceae     | Turicibacter   | +           | Anaerobic   | N           | Animal and human microbiota                                                          | Y | Outdoor | Beijing                   | n.a                | Cao et al., 2014                  | Bosshard et al., 2002                          |
| Clostridiaceae        | Caloramator    | +           | Anaerobic   | Variable    | Thermal environments                                                                 | Y | Outdoor | Beijing                   |                    | Cao et al., 2014                  | Seyfried et al., 2002                          |
| Clostridiaceae        | Clostridium    | +           | Anaerobic   | Y           | Variable, includes human microbiota, animal microbiota, and plant microbiota         | Y | Outdoor | Israel                    | Clear days         | Gat et al., 2017                  | Wiegel et al., 2006                            |
| Clostridiaceae        | SMB53          | Not defined | Not defined | Not defined | Gut microbe                                                                          | N |         |                           |                    |                                   | Hsieh Y-H. et al., 2016                        |
| Peptostreptococcaceae | Unassigned     | Variable    | Anaerobic   | N           | Variable, includes human microbiota, manure, soil, and sediments, and deep sea vents | Y | Indoor  | Denmark                   | Indoor             | Vestergaard et al., 2018          | Rosenberg et al., 2013; Galperin et al., 2016; |
| Veillonellaceae       | Unassigned     | -           | Variable    | N           | Variable, includes beer spoilage, animal and human microbiota                        | N |         |                           |                    |                                   | Marchandin et al., 2014                        |
| Bradyrhizobiaceae     | Bradyrhizobium | -           | Aerobic     | N           | Soil, plant roots                                                                    | Y | Outdoor | Beijing; Washington DC    | Urban              | Cao et al., 2014; Be et al., 2015 | Marcondes de Souza et al., 2014                |
| Rhodobacteraceae      | Paracoccus     | -           | Aerobic     | N           | Soil                                                                                 | Y | Outdoor | Atlantic Ocean; US Virgin | Sahar, Sahar/Sahel | Griffin et al., 2006; 2007;       | Urakami et al., 1990;                          |

|                    |               |   |                       |   |                                                                          |   |         |                                       |                             |                                                                                                                            |                                                                                    |
|--------------------|---------------|---|-----------------------|---|--------------------------------------------------------------------------|---|---------|---------------------------------------|-----------------------------|----------------------------------------------------------------------------------------------------------------------------|------------------------------------------------------------------------------------|
| Comamonadaceae     | Unassigned    | - | Variable              | N | Variable, includes aquatic, soil, animal microbiome                      | Y | Outdoor | Islands; Mali<br>Japan, European Alps | Asian deserts; Sahara/Sahel | Kellogg et al., 2004<br>Maki et al., 2018; Meola et al., 2015<br>Cao et al., 2014; Byung Cheol Cho & Chung Yeon Hwang 2011 | Kelly et al., 2006<br>Willems et al., 1991; Willems 2014<br>Mikhailov et al., 2006 |
| Alteromonadaceae   | Alteromonas   | - | Aerobic               | N | Marine                                                                   | Y | Outdoor | Beijing, East Sea                     |                             |                                                                                                                            |                                                                                    |
| Enterobacteriaceae | Unassigned    | - | Facultative Anaerobic | N | Variable, includes aquatic, terrestrial, animal microbiota (prokaryotes) | Y | Outdoor | Japan                                 |                             | Maki et al., 2018                                                                                                          | Octavia and Lan, 2014                                                              |
| Enterobacteriaceae | Erwinia       | - | Facultative Anaerobic | N | Plant microbiome                                                         | Y | Outdoor | Greater Mexico city                   |                             | Garcia-Mena et al., 2016                                                                                                   | Kado, 2006                                                                         |
| Enterobacteriaceae | Escherichia   | - | Facultative Anaerobic | N | Human microbiota                                                         | Y | Both    | Spain, Mexico City                    |                             | Sanz et al., 2005; Santos-Burgoa and Rosas, 2015                                                                           | Janda 2006; Welch 2006<br>Bouvet and Grimont, 1986                                 |
| Moraxellaceae      | Acinetobacter | - | Aerobic               | N | Human microbiota                                                         | N |         |                                       |                             |                                                                                                                            |                                                                                    |

|                   |               |   |                       |   |                                       |   |         |                                                                          |                                                            |                                                   |
|-------------------|---------------|---|-----------------------|---|---------------------------------------|---|---------|--------------------------------------------------------------------------|------------------------------------------------------------|---------------------------------------------------|
| Moraxellaceae     | Enhydrobacter | - | Facultative Anaerobic | N | Eutrophic lake, human microbiome      | Y | Both    | Beijing, Norway (underground subway station), Hong Kong (subway station) | Cao et al., 2014; Dybwad et al., 2012; Marcus et al., 2014 | Staley et al., 1987                               |
| Salinisphaeraceae | Salinisphaera | - | Aerobic               | N | Hypersaline environments              | Y | Outdoor | Beijing                                                                  | Cao et al., 2014                                           | Crespo-Medina et al., 2009; Vetriani et al., 2014 |
| Vibrionaceae      | Vibrio        | - | Facultative Anaerobic | N | Aquatic, some species human pathogens | Y | Outdoor | Beijing                                                                  | Cao et al., 2014; Fang et al., 2007                        | Madigan and Martinko, 2005                        |
| Sinobacteraceae   | Unassigned    | - | Aerobic               | N | Soil                                  | N |         | -                                                                        |                                                            | Zhou et al., 2008                                 |

# Supplemental Figure 1 – Backward trajectories constructed using NOAA HYSPLIT MODEL for each sample.

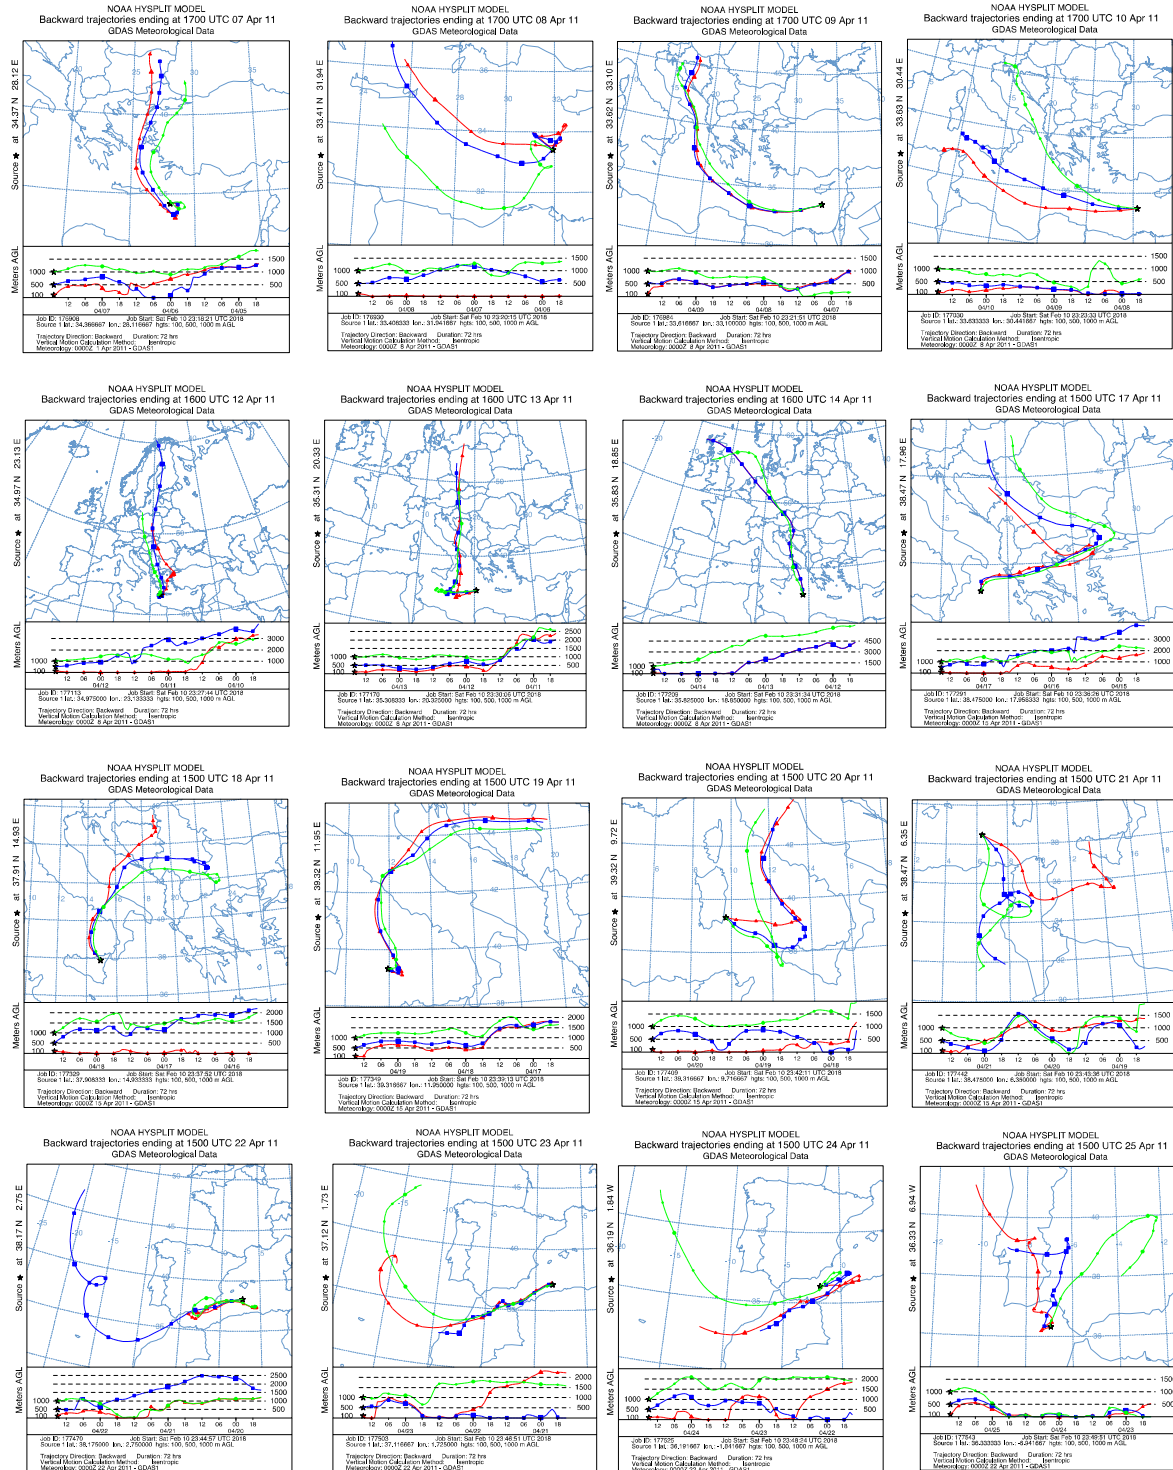

Supplement: s1 [file s1]
